# Supplementary material for: Ventilation-Associated Particulate Matter Is a Potential Reservoir of Multidrug-Resistant Organisms in Health Facilities
Source: MDPI journal article supplement (doi:10.3390/life11070639), 2021-06-30
Supplement: s1 [file s1]

## Article

# Ventilation-Associated Particulate Matter is a Potential Reservoir of Multidrug-Resistant Organisms in Health Facilities

Evgenia Chezganova <sup>1</sup>, Olga Efimova <sup>2</sup>, Vera Sakharova <sup>3</sup>, Anna Efimova <sup>4</sup>, Sergey Sozinov <sup>2</sup>, Anton Kutikhin <sup>3</sup>, Zinifer Ismagilov <sup>2</sup> and Elena Brusina <sup>1,\*</sup>

<sup>1</sup> Department of Epidemiology, Kemerovo State Medical University, Kemerovo 650056, Russia; chezganova@kemsma.ru

<sup>2</sup> Institute of Coal Chemistry and Material Science, Siberian Branch of the Russian Academy of Sciences, Kemerovo 650099, Russia; efimova@iccms.sbras.ru (O.E.); sozinov@iccms.sbras.ru (S.S.); ismagilov@iccms.sbras.ru (Z.I.)

<sup>3</sup> Department of Experimental Medicine, Research Institute for Complex Issues of Cardiovascular Diseases, Kemerovo 650002, Russia; sahvam@kemcardio.ru (V.S.); kytia@kemcardio.ru (A.K.)

<sup>4</sup> Kemerovo Regional Center for Hygiene and Epidemiology, Kemerovo 650002, Russia; efimova@fguzko.ru

\* Correspondence: brusina@kemsma.ru; Tel.: +7-905-962-18-15

**Citation:** Chezganova, E.; Efimova, O.; Sakharova, V.; Efimova, A.; Sozinov, S.; Kutikhin, A.; Ismagilov, Z.; Brusina, E.

Ventilation-Associated Particulate Matter is a Potential Reservoir of Multidrug-Resistant Organisms in Health Facilities. *Life* **2021**, *11*, 639. <https://doi.org/10.3390/life11070639>

Academic Editor: Milan Kolář

Received: 27 May 2021

Accepted: 29 June 2021

Published: 30 June 2021

**Publisher's Note:** MDPI stays neutral with regard to jurisdictional claims in published maps and institutional affiliations.

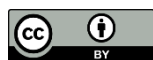

**Copyright:** © 2021 by the authors. Licensee MDPI, Basel, Switzerland. This article is an open access article distributed under the terms and conditions of the Creative Commons Attribution (CC BY) license (<http://creativecommons.org/licenses/by/4.0/>).

**Abstract:** Most healthcare-associated infections (HCAIs) develop due to the colonisation of patients and healthcare workers by multidrug-resistant organisms (MDRO). Here, we investigated whether the particulate matter from the ventilation systems (Vent-PM) of health facilities can harbour MDRO and other microbes, thereby acting as a potential reservoir of HCAIs. Dust samples collected in the ventilation grilles and adjacent air ducts underwent a detailed analysis of physico-chemical properties and biodiversity. All Vent-PM samples included ultrafine PM capable of reaching the alveoli. Strikingly, > 70% of Vent-PM samples were contaminated, mostly by viruses (> 15%) or multidrug-resistant and biofilm-producing bacterial strains (60% and 48% of all bacteria-contaminated specimens, respectively). Total viable count at 1 m from the ventilation grilles was significantly increased after opening doors and windows, indicating an association between air flow and bacterial contamination. Both chemical and microbial compositions of Vent-PM considerably differed across surgical vs. non-surgical and intensive vs. elective care units and between health facilities located in coal and chemical districts. Reduced diversity among MDRO and increased prevalence ratio in multidrug-resistant to the total *Enterococcus spp.* in Vent-PM testified to the evolving antibiotic resistance. In conclusion, we suggest Vent-PM as a previously underestimated reservoir of HCAI-causing pathogens in the hospital environment.

**Keywords:** particulate matter; air pollution; hospital dust; ventilation grilles; multidrug-resistant organisms; healthcare-associated infections; HCAI-causing pathogens; reservoir of infection; microbial diversity; chemical composition

## Supplementary Materials:

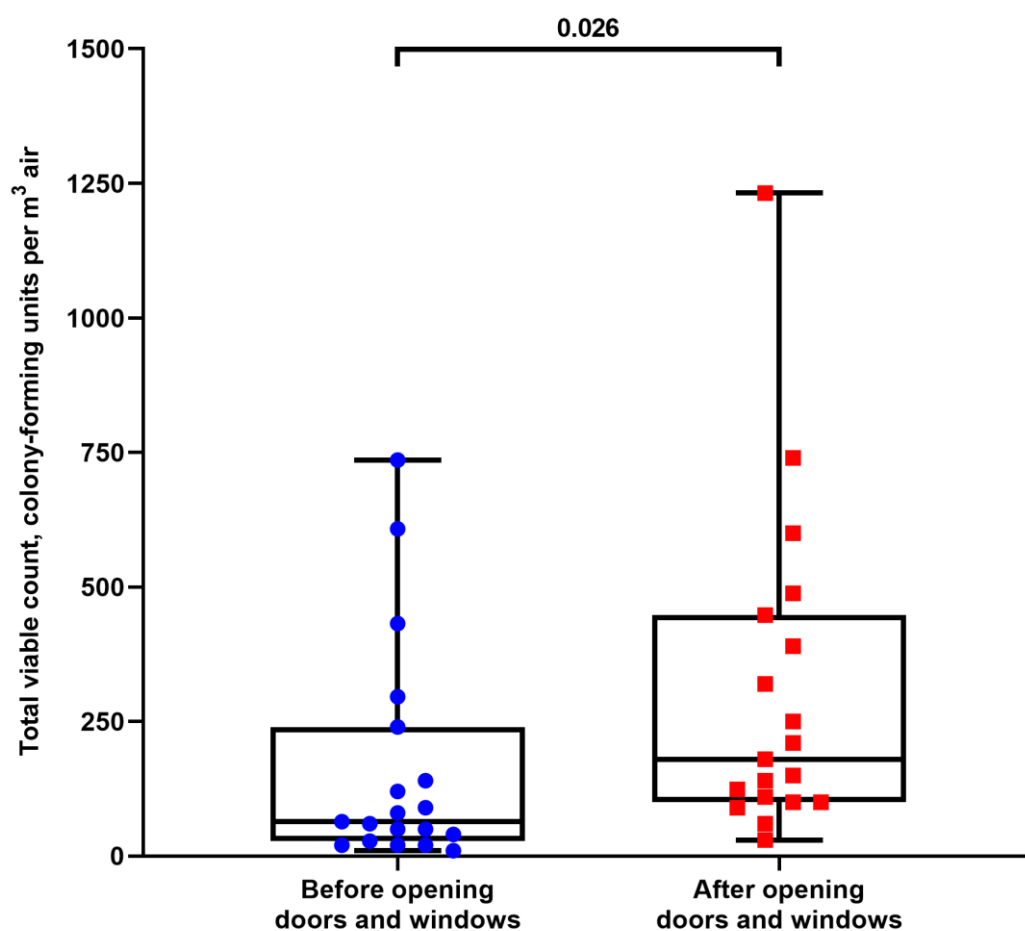

**Figure S1.** Total viable count in the hospital air before (blue circle dots) and after (red square dots) opening doors and windows. Each dot represents one air sample. *P* values provided above the boxes, Wilcoxon matched-pairs signed rank test.
